# Supplementary material
Source: publisher figshare collection journal article supplement (https://frontiersin.figshare.com/ndownloader/files/13663412)
Supplement: Supplementary file [file 13663412]

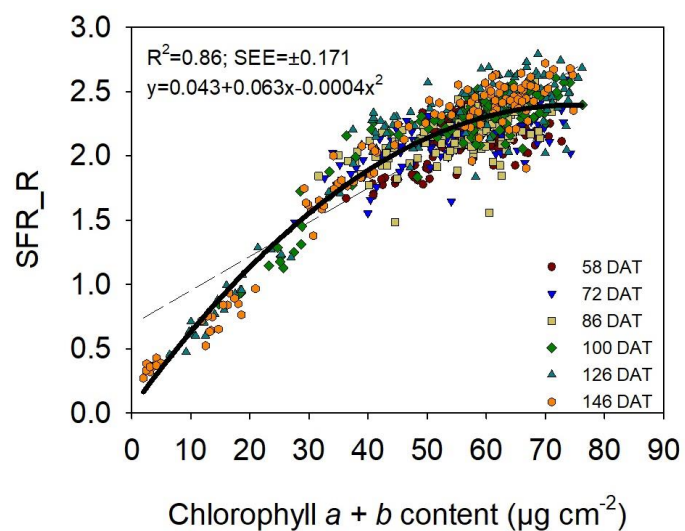

Figure S2. Relationship between chlorophyll  $a + b$  content ( $\mu\text{g cm}^{-2}$ ) and the Simple Fluorescence Ratio under red excitation (SFR\_R), measured with the Multiplex sensor. Coefficient of determination ( $R^2$ ), standard error of the estimate ( $\pm\text{SEE}$ ) and equation of the regression are shown (solid line). The dotted line represents the linear regression.
